# Supplementary material for: Adipocyte deletion of the oxygen-sensor PHD2 sustains elevated energy expenditure at thermoneutrality
Source: PubMed Central journal article supplement (PMC11362468; doi:10.1038/s41467-024-51718-7), 2024-08-29
Supplement: 41467_2024_51718_MOESM1_ESM.pdf [file 41467_2024_51718_MOESM1_ESM.pdf]

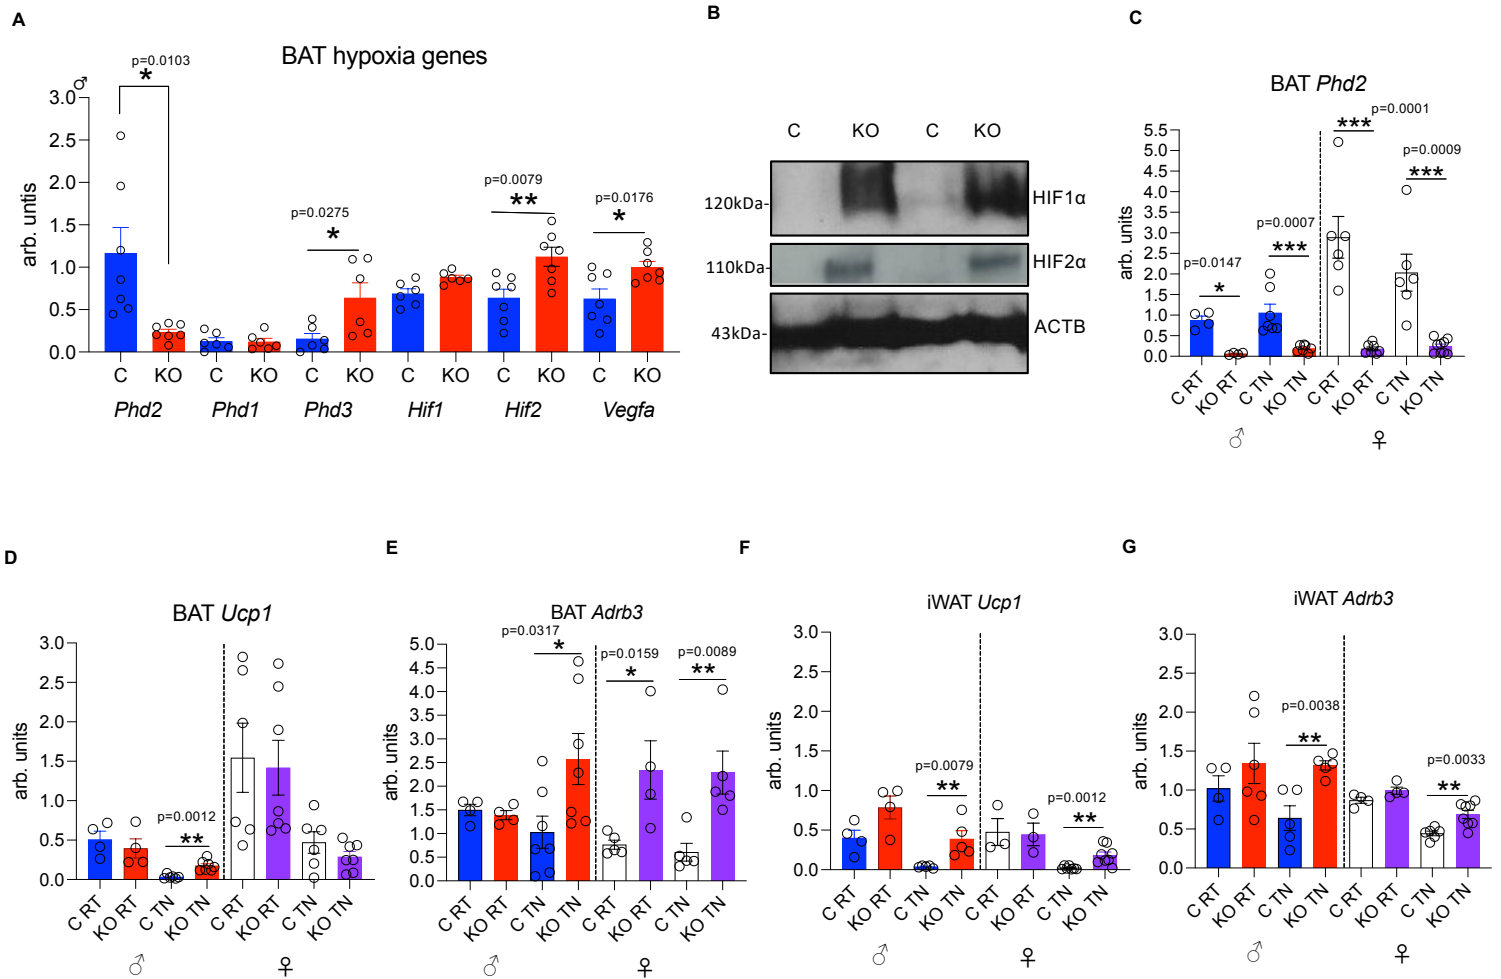

**Supplemental Figure 1. P2KO<sup>ad</sup> mice show enhanced HIF and adrenergic signaling in adipose at TN.** **A** Efficient knock down of *Phd2* mRNA in P2KO<sup>ad</sup> males (red) and subsequent induction of the HIF-target genes, *Phd3*, *Hif2* & *Vegfa* (control:n=6; KO:n=7) in BAT. **B** P2KO<sup>ad</sup> mice show stabilization of HIF1α and HIF2α isoforms in BAT. **C** *Phd2* mRNA levels in male and female mice at room temperature (RT) and thermoneutrality (TN). **D-E** Higher mRNA levels of the beta-3-adrenergic receptor, *Adrb3*, in male and female BAT and *Ucp1* in P2KO<sup>ad</sup> male BAT. **F-G** At TN, both male and female P2KO<sup>ad</sup> mice have higher *Adrb3* and *Ucp1* levels in iWAT. Dashed vertical line indicates not direct comparisons in males and females. Significance by Students t-test (2-tailed) or 2-way ANOVA (temperature, genotype). \* $p < 0.05$ , \*\* $p < 0.01$ , \*\*\* $p < 0.001$ . Source data are provided as a Source Data file

A

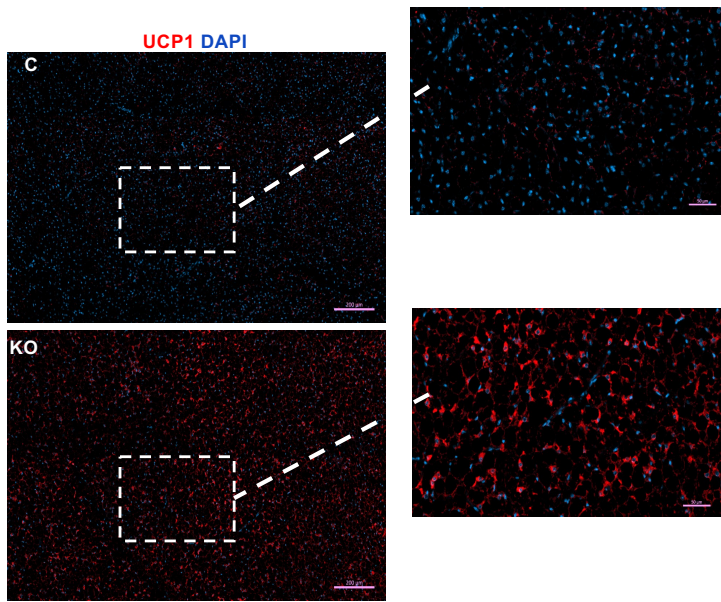

B

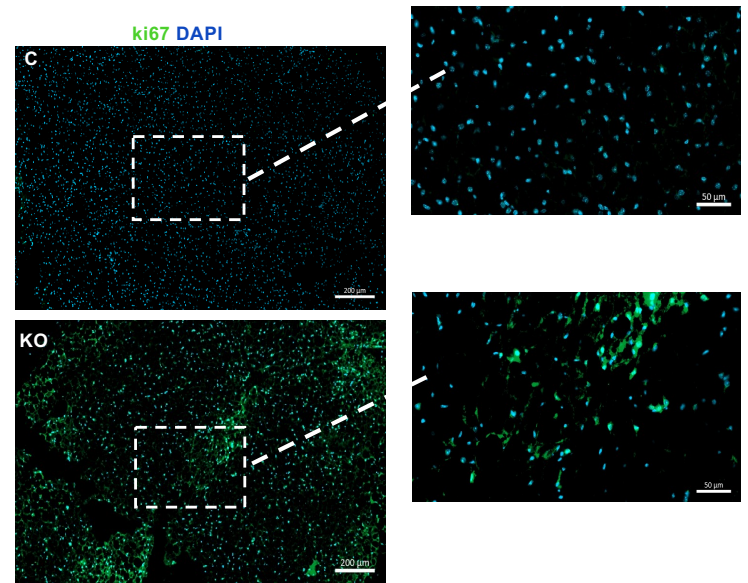

C

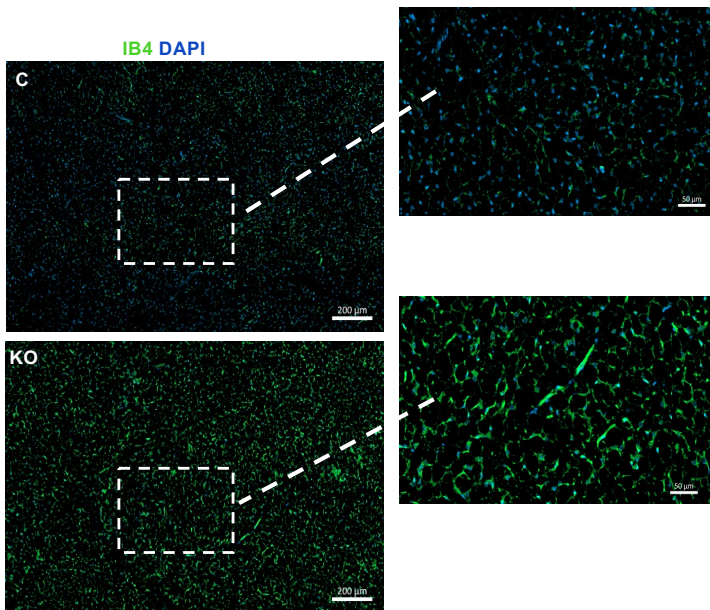

D

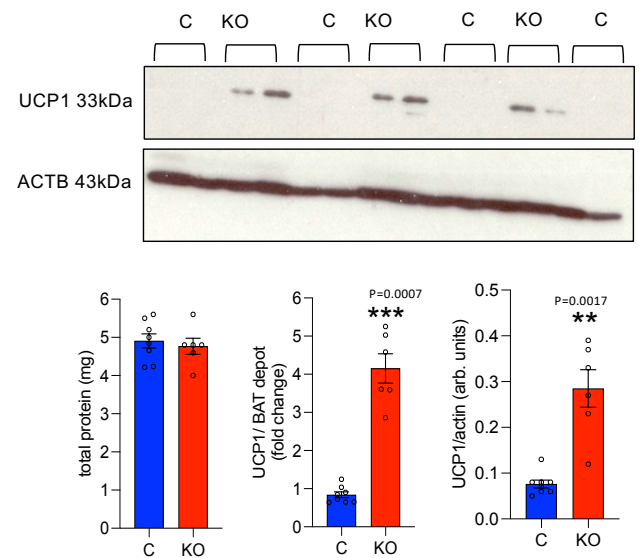

### Supplemental Figure 2. Increased BAT remodeling in male *P2KO<sup>ad</sup>* mice at TN.

Brown adipose immunofluorescence shows higher numbers of UCP1+ cells **A**, ki67+ cells **B** and isolectin IB4 staining **C** in BAT at TN (n=3/group, biological replicates). Images (left) at 200µm and dashed square indicates image selected for higher magnification at 50µm as seen in Figure 4C; C is control, KO is *P2KO<sup>ad</sup>*. Nuclei shown with DAPI in blue. **D** UCP1 protein levels in brown adipose of control (blue bars; n=8) and *P2KO<sup>ad</sup>* (red bars, n=6) mice housed as TN. Significance by Students t-test (2-tailed) \*\* p<0.01, \*\*\*p<0.001. Source data are provided as a Source Data file

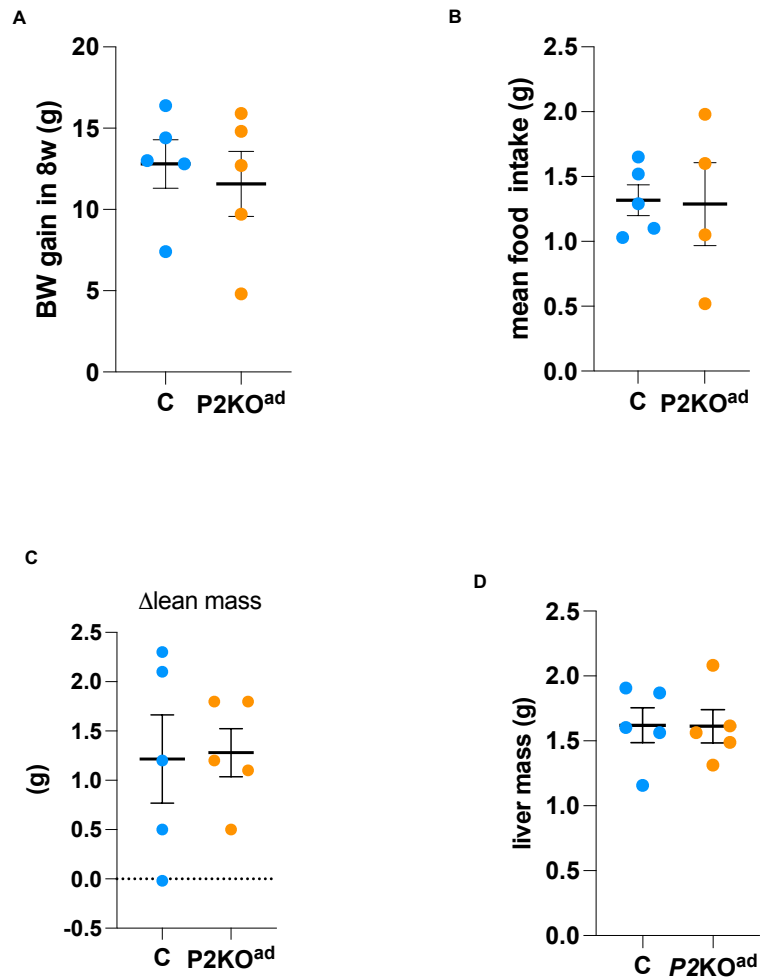

**Supplemental Figure 3. Physiological and tissue responses after HFD at TN.**

**A** Body weight gain after high fat feeding (HFD) in male control (C; light blue) and P2KO<sup>ad</sup> (KO; orange) housed at TN (28-29°C) for 8weeks (n=5/group, biological replicates). **B** Mean food intake in individually housed mice the first 3-days of HFD. **C** Lean mass change during HFD by TD-NMR and **D** liver weights corrected for body weight. Significance tested by Students t-test (2-tailed). Source data are provided as a Source Data file

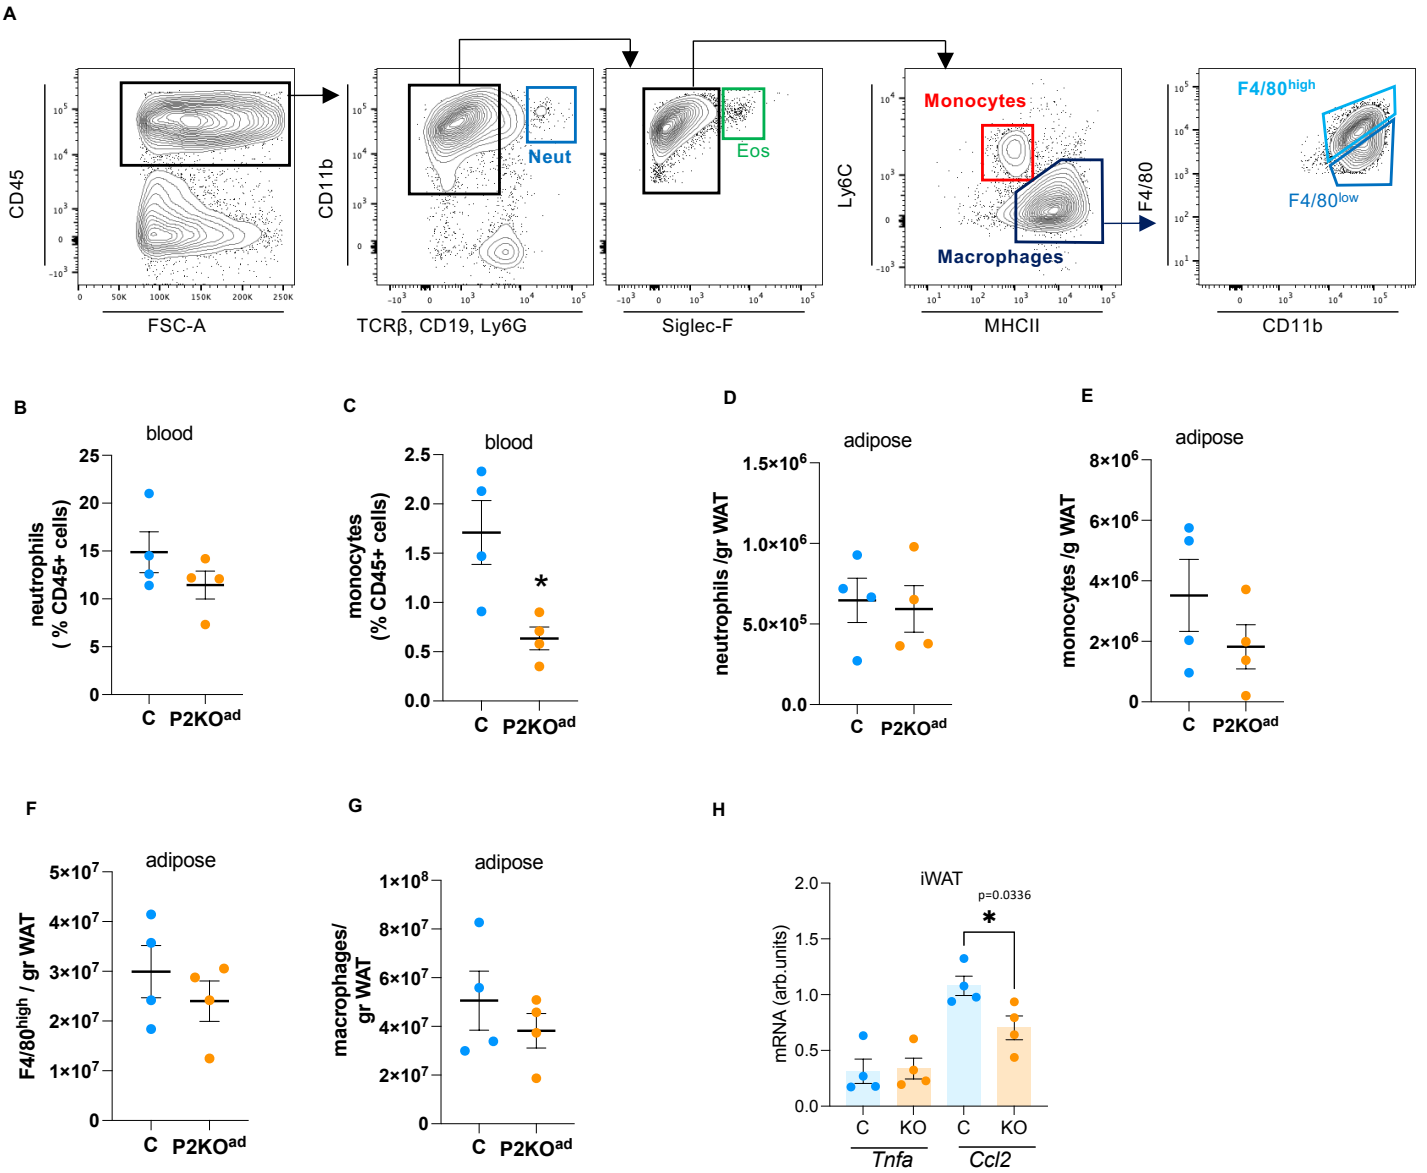

**Supplemental Figure 4. *P2KO<sup>ad</sup>* male mice have similar WAT inflammatory cells to control mice after diet-induced obesity at thermoneutrality.**

**A** Representative flow-cytometric gating strategy used to identify immune cells in epididymal adipose tissue and blood from high fat fed male control (C; light blue) and *P2KO<sup>ad</sup>* (KO; orange) housed at TN (28-29°C), with neutrophils (Neut) identified as CD11b<sup>+</sup>Ly6G<sup>+</sup> cells, CD11b<sup>+</sup>Siglec-F<sup>+</sup> eosinophils (Eos), Ly6C<sup>+</sup>MHCII<sup>+</sup>Ly6G<sup>+</sup>Siglec-F<sup>+</sup> monocytes. Ly6C<sup>int</sup>MHCII<sup>+</sup> macrophages were further divided in F4/80<sup>high</sup> and F4/80<sup>low</sup> macrophages. **B-C** Quantification of the percentage of neutrophils and monocytes found in the CD45<sup>+</sup> immune cells of the blood. **D-G** Number of neutrophils, monocytes, resident F4/80<sup>high</sup> macrophages and inflammatory macrophages found per g of epididymal adipose tissue. **H** mRNA levels of Tumor necrosis factor (*Tnfa*) and Chemokine (C-C Motif) Ligand (*Ccl2*) in inguinal white adipose. n=4-5/group; Significance by Students t-test (2-tailed); n=4/group (biological replicates) \*p<0.05. Source data are provided as a Source Data file

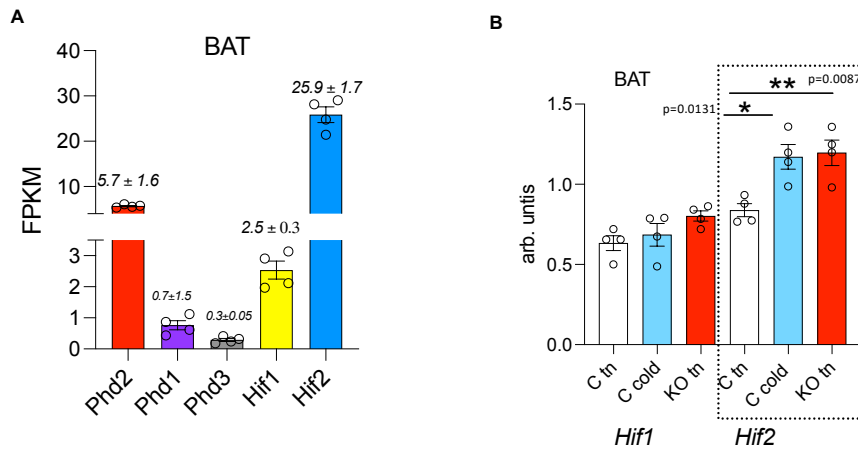

**Supplemental Figure 5. Analysis of the PHD-HIF pathway components in brown adipose tissue.**

**A** BAT RNA-sequencing data from 10-week old mice housed at RT show that *Phd2* and *HIF2a* are the most highly expressed genes (n=4/group).

**B** Brown adipose tissue *Hif1* mRNA levels, in contrast to *Hif2* levels, are not regulated by acute cold exposure.

Control C57BL/6 male mice exposed to acute cold show increased *Hif2* mRNA expression levels in brown adipose tissue (light blue bars; boxed selection).

Note that *P2KO*<sup>ad</sup> mice (red bars, boxed selection) have similar *Hif2* mRNA levels at 29°C (tn) to control mice at cold (6°C) (n=4/group).

Significance tested with one-way ANOVA, \* $p < 0.05$ , \*\* $p < 0.001$ . Source data are provided as a Source Data file

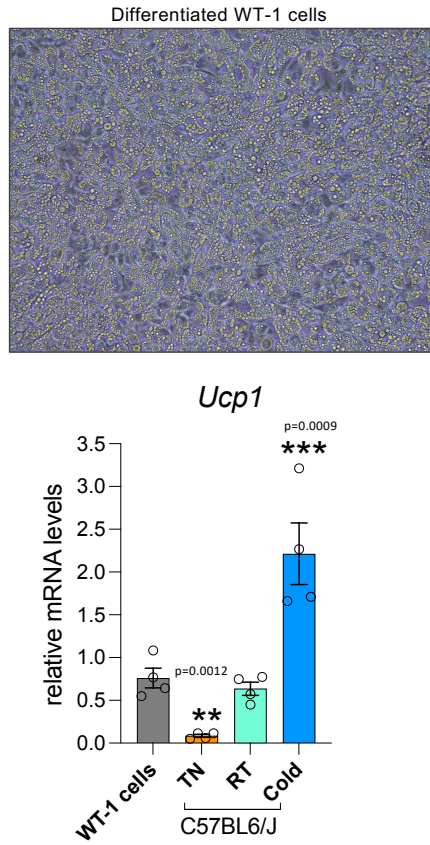

**Supplemental Figure 6. Relative *Ucp1* mRNA levels in fully differentiated WT-1 brown cells.** Comparison of *Ucp1* mRNA levels in fully differentiated WT-1 cells (image showing lipid droplets in brown adipocytes, magnification, 200 $\mu$ m) with levels measured in male C57BL6/J mouse brown adipose tissue housed at room temperature (RT: 21 $^{\circ}$ C), thermoneutrality (TN:29 $^{\circ}$ C) or cold (6 $^{\circ}$ C, 24h). Note that WT-1 cells have similar *Ucp1* levels to mouse BAT at RT. n=4/group; Significance by ANOVA, \*\*\*p<0.001. Source data are provided as a Source Data file

Table S1: Composition of diets

| Chow diet<br>CRM E, Special Diets Services |           | D12331 58%kcal fat and sucrose<br>Research diets |                                  |         |
|--------------------------------------------|-----------|--------------------------------------------------|----------------------------------|---------|
| protein -crude protein                     | 14.4%     | protein                                          | Casein, lactic,<br>30mesh        | 228g    |
| Lipids-crude fat                           | 2.7%      | protein                                          | Methionine, DL                   | 2g      |
| Crude ash                                  | 6%        | carbohydrate                                     | Sucrose, fine<br>granulated      | 184g    |
| fibre                                      | 4.7%      | carbohydrate                                     | Lodex 10                         | 170g    |
| Ca                                         | 0.73%     | fat                                              | Coconut oil,<br>hydrogenated 101 | 333.5g  |
| P                                          | 0.52%     | Fat                                              | Soyabean oil, USP                | 25g     |
| Na                                         | 0.25%     | mineral                                          | S10001A                          | 20g     |
| Vit.A-3a672a                               | 8000IU/kg | mineral                                          | Calcium phosphate                | 20g     |
| Vit.D3-3a671                               | 600IU/kg  | mineral                                          | Sodium bicarbonate               | 10.5g   |
| Vit.E-3a700                                | 64IU/kg   | mineral                                          | Potassium citrate                | 4g      |
| Cu-3b405                                   | 2mg/kg    | vitamin                                          | Choline bitartrate               | 2g      |
| Fe-3b103                                   | 83mg/kg   | vitamin                                          | V10001C                          | 1g      |
| Mn-3b502                                   | 20mg/kg   | dye                                              | Red FD&C, Alum.<br>Lake 35-42%   | 0.1g    |
| Se-3b801                                   | 0.1mg/kg  |                                                  | Total                            | 1000.1g |
| Co-3b304                                   | 0.65/kg   |                                                  |                                  |         |
|                                            |           |                                                  |                                  |         |

Table S2: List of TaqMan Assays

| <b>Gene mouse</b> | <b>Assay ID</b>      |
|-------------------|----------------------|
| Egln1             | <u>Mm00459769_m1</u> |
| Egln2             | <u>Mm00519067_m1</u> |
| Egln3             | <u>Mm00472200_m1</u> |
| Hif1a             | <u>Mm01283757_m1</u> |
| Epas1             | <u>Mm00438712_m1</u> |
| Vegfa             | <u>Mm00437306_m1</u> |
| Ucp1              | <u>Mm01244861_m1</u> |
| Adbr3             | <u>Mm02601819_g1</u> |
| Tnfa              | <u>Mm00443258_m1</u> |
| Ccl2              | <u>Mm00441242_m1</u> |
| Ppia              | <u>Mm02342430_g1</u> |
| <b>Gene Human</b> |                      |
| UCP1              | <u>Hs01084772_m1</u> |
| PPIA              | <u>Hs04194521_s1</u> |
| ADBR2             | <u>Hs00240532_s1</u> |



Table S3: List of primers

| Letter indicates site on <i>mUCP1</i> as per schematic in Figure 7D | 5' Primer              | 3' Primer            |
|---------------------------------------------------------------------|------------------------|----------------------|
| A                                                                   | gttgtaggaccctccactgc   | gtctgggatgaaccggagac |
| B                                                                   | aacatgcctggaggattcc    | gctgtcctggagctgttct  |
| C                                                                   | gaggctagacgagggcattg   | aaagatgatgcagtgttgag |
| D                                                                   | tgggaaagtgcgatgcaca    | ttgcctccatctgctcctc  |
| E                                                                   | tgtgctcattcccacagaaagt | gctgctgcatcatgatccc  |
| F                                                                   | cctggccaaggctgttgaa    | gagctgctagtgggactgg  |
| G                                                                   | gaagggacgctcaccttga    | atctgccaggcaagctgaaa |

Table S4: List of antibodies used in the study

| <b>Antigen Name</b> | <b>Conjugate</b> | <b>Clone</b> | <b>Manufacturer</b> | <b>dilution</b> |
|---------------------|------------------|--------------|---------------------|-----------------|
| CD11b               | PE Dazzle        | M170         | Biologend           | 1:200           |
| CD19                | BV421            | 6D5          | Biologend           | 1:200           |
| CD206               | FITC             | MCA2235FA    | Miltenyi            | 1:200           |
| CD45.2              | BV650            | 104          | Biologend           | 1:200           |
| F4/80               | PE/Cy7           | BM8          | Biologend           | 1:200           |
| Ly6C                | AF700            | HK1.4        | Biologend           | 1:200           |
| Ly6G                | BV421            | 1A8          | Biologend           | 1:200           |
| MHCII IIA/IE        | APCe780          | M5/114.15.2  | ebiosciences        | 1:600           |
| Siglec-F            | PE               | E50-2440     | BD                  | 1:200           |
| TCRb                | BV421            | h57-597      | Biologend           | 1:200           |
